# Supplementary material for: Preparation of amphiphilic poly(divinylbenzene-co-N-vinylpyrrolidone)-functionalized polydopamine magnetic nanoadsorbents for enrichment of synthetic cannabinoids in wastewater
Source: Royal Society of Chemistry journal article supplement (doi:10.1039/d4ay00711e), 2024-01-01
Supplement: d4ay00711e1.pdf [file d4ay00711e1.pdf]

SUPPLEMENTARY INFORMATION

Preparation of amphiphilic poly(divinylbenzene-co-N-vinylpyrrolidone)-functionalized polydopamine magnetic nanoadsorbents for enrichment of synthetic cannabinoids in wastewater

Xiuchen Li <sup>1,3</sup>, Le Jiang <sup>1,3</sup>, Bin Di <sup>1,3\*</sup>, Chi Hu <sup>2,3\*</sup>

<sup>1</sup> Department of Pharmacy, China Pharmaceutical University, No.24 Tongjiaxiang Road, Nanjing 210009, PR China.

<sup>2</sup> Department of Pharmaceutical Engineering, China Pharmaceutical University, No.24 Tongjiaxiang Road, Nanjing 210009, PR China.

<sup>3</sup> China National Narcotics Control Commission-China Pharmaceutical University Joint Laboratory on Key Technologies of Narcotics Control, No.24 Tongjiaxiang Road, Nanjing 210009, PR China.

\*Corresponding authors: dibin@cpu.edu.cn; chihu@cpu.edu.cn

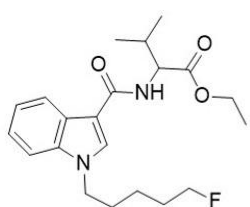

**5F-EMB-PICA**

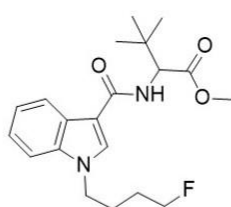

**4F-MDMB-BUTICA**

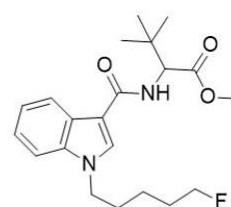

**5F-MDMB-PICA**

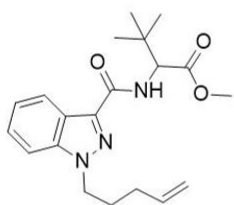

**MDMB-4en-PINACA**

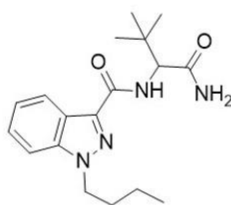

**ADB-BUTINACA**

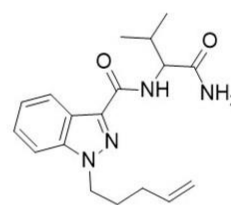

**ADB-4en-PINACA**

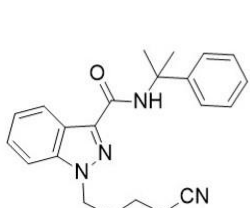

**4CN-CUMYL-BUTINACA**

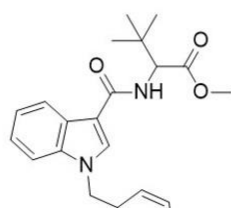

**MDMB-FUBICA**

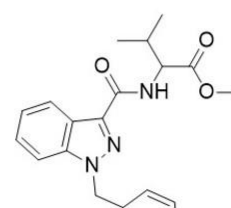

**AMB-FUBINACA**

**Fig. S1.** The structures of nine synthetic cannabinoids.

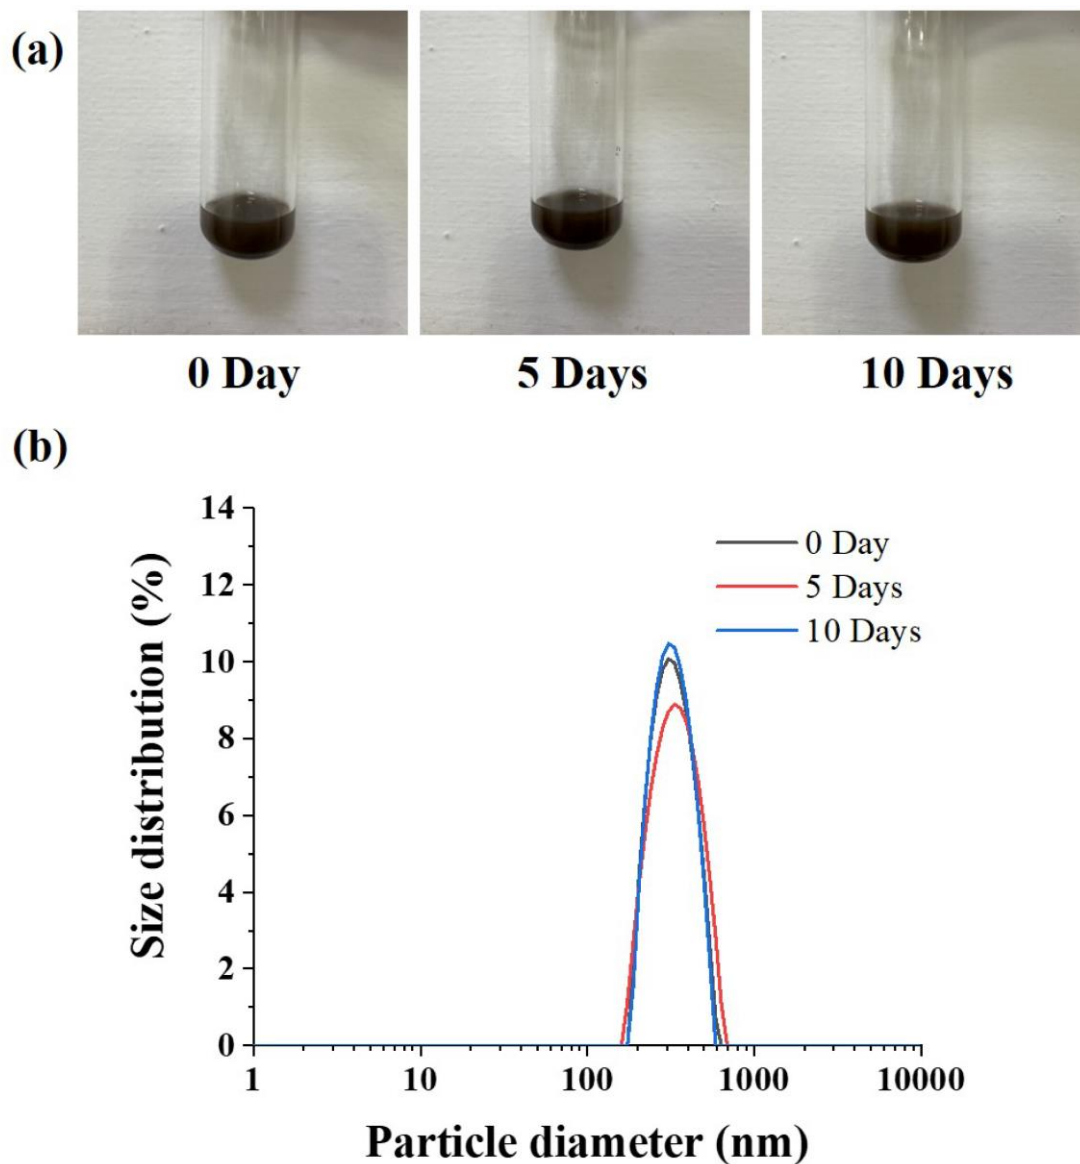

**Fig. S2.** (a) Digital photographs of  $\text{Fe}_3\text{O}_4@\text{PDA}@\text{poly}(\text{DVB-co-NVP})$  MNPs dispersion in ethanol for ten days. (b) Dynamic light scattering (DLS) of  $\text{Fe}_3\text{O}_4@\text{PDA}@\text{poly}(\text{DVB-co-NVP})$  MNPs in ethanol for ten days.

The mean hydrodynamic diameters for  $\text{Fe}_3\text{O}_4@\text{PDA}@\text{poly}(\text{DVB-co-NVP})$  MNPs dispersed in ethanol were 339 nm on day 0, 354 nm on day 5 and 329 nm on day 10, respectively. As the particle diameter and visual appearance exhibited negligible difference within ten days, the synthesized nanoadsorbents are supposed to be stable during storage.

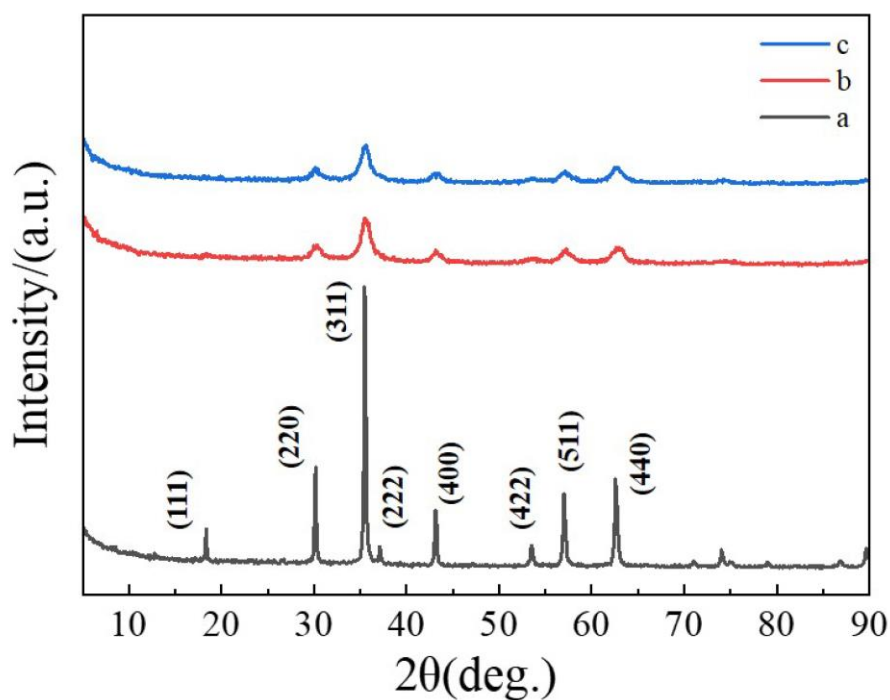

**Fig. S3.** XRD patterns of (a)  $\text{Fe}_3\text{O}_4$  MNPs, (b)  $\text{Fe}_3\text{O}_4@PDA$  MNPs and (c)  $\text{Fe}_3\text{O}_4@PDA@poly(DVB-co-NVP)$  MNPs.

The XRD patterns of  $\text{Fe}_3\text{O}_4$ ,  $\text{Fe}_3\text{O}_4@PDA$  and  $\text{Fe}_3\text{O}_4@PDA@poly(DVB-co-NVP)$  MNPs are shown in Fig. S3. Common peaks were observed at  $18.1^\circ$ ,  $30.2^\circ$ ,  $35.6^\circ$ ,  $36.2^\circ$ ,  $43.4^\circ$ ,  $53.8^\circ$ ,  $57.2^\circ$ , and  $62.8^\circ$ , which were assigned to (111), (220), (311), (222), (400), (422), (511), and (440) planes, confirming the cubic crystallinity of the magnetite  $\text{Fe}_3\text{O}_4$  nanoparticle core compared with standard XRD peaks (JCPDS No.19-0629)[1]. Surface modifications with PDA did not result in phase change of the  $\text{Fe}_3\text{O}_4$  particles[2,3]. However, the XRD peaks of  $\text{Fe}_3\text{O}_4@PDA@poly(DVB-co-NVP)$  were broader and lower compared with those of  $\text{Fe}_3\text{O}_4@PDA$ . This phenomenon is likely because the additional poly(DVB-co-NVP) coating on the surface reduce and cover up the intensities of the corresponding peaks[4]. It can be concluded that the magnetic particles were successfully fabricated.

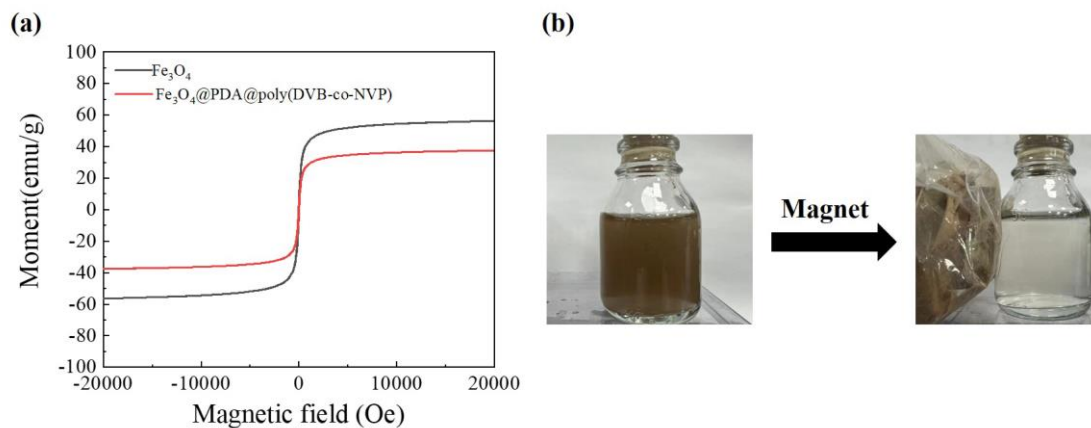

**Fig. S4.** (a) magnetization curves of  $\text{Fe}_3\text{O}_4$  MNPs and  $\text{Fe}_3\text{O}_4@\text{PDA}@\text{poly}(\text{DVB-co-NVP})$  MNPs. (b) Magnetic separation of  $\text{Fe}_3\text{O}_4@\text{PDA}@\text{poly}(\text{DVB-co-NVP})$  MNPs.

Fig. S4(a) shows the magnetic properties of  $\text{Fe}_3\text{O}_4$  MNPs and  $\text{Fe}_3\text{O}_4@\text{PDA}@\text{poly}(\text{DVB-co-NVP})$  MNPs measured by VSM at a temperature of 300K. The practical saturation magnetization of  $\text{Fe}_3\text{O}_4$  MNPs and  $\text{Fe}_3\text{O}_4@\text{PDA}@\text{poly}(\text{DVB-co-NVP})$  is calculated at 56.33 and 37.38 emu/g. From the data, it can be seen that after coating and fabrication of  $\text{Fe}_3\text{O}_4@\text{PDA}@\text{poly}(\text{DVB-co-NVP})$  MNPs, the actual saturation magnetization showed a tendency of decrease. Though  $\text{Fe}_3\text{O}_4@\text{PDA}@\text{poly}(\text{DVB-co-NVP})$  MNPs exhibited a compromised magnetism compared to  $\text{Fe}_3\text{O}_4$ , both of them could be readily separated from solution by applying a magnet as shown in Fig. S4(b), supporting their application as MSPE adsorbents.

**Table S1.** Real sample analysis

| Samples | MDMB-<br>FUBICA | 4CN-CUMYL-<br>BUTINACA | 5F-MDMB-<br>PICA | MDMB-4en-<br>PINACA | ADB-4en-<br>PINACA | 5F-EMB-<br>PICA | AMB-<br>FUBINACA | ADB-<br>BUTINACA | 4F-MDMB-<br>BUTICA |
|---------|-----------------|------------------------|------------------|---------------------|--------------------|-----------------|------------------|------------------|--------------------|
| S1      | -               | -                      | -                | -                   | -                  | -               | -                | -                | -                  |
| S2      | -               | -                      | -                | -                   | -                  | -               | -                | -                | -                  |
| S3      | -               | -                      | -                | -                   | -                  | -               | -                | -                | -                  |
| S4      | -               | -                      | -                | -                   | -                  | -               | -                | -                | -                  |
| S5      | -               | 0.15                   | -                | -                   | -                  | -               | -                | -                | -                  |
| S6      | -               | -                      | -                | -                   | -                  | -               | -                | -                | -                  |
| S7      | -               | -                      | -                | -                   | -                  | -               | -                | -                | -                  |
| S8      | -               | -                      | -                | -                   | -                  | -               | -                | -                | -                  |
| S9      | -               | 0.11                   | -                | -                   | -                  | -               | -                | -                | -                  |
| S10     | -               | <LOQ                   | -                | -                   | -                  | -               | -                | -                | -                  |
| S11     | -               | -                      | <LOQ             | <LOQ                | -                  | -               | -                | -                | -                  |
| S12     | -               | -                      | <LOQ             | <LOQ                | -                  | -               | -                | -                | -                  |

## References

- [1] B.Y. Yu, S.-Y. Kwak, Assembly of magnetite nanocrystals into spherical mesoporous aggregates with a 3-D wormhole-like pore structure, *Journal of Materials Chemistry* 20 (2010) 8320. <https://doi.org/10.1039/c0jm01274b>.
- [2] F. Zafar, H. Wang, C. Lv, M.-H. Ullah, C. Liu, Y. Hua, L. Mei, J. Huang, Enhancement of GAD storage stability with immobilization on PDA-coated superparamagnetic magnetite nanoparticles, *Catalysts* 9 (2019) 969. <https://doi.org/10.3390/catal9110969>.
- [3] H. Veisi, F. Parvizi, M.R. Abdi, Magnetic solid-phase extraction and uv/vis spectrophotometric determination of trace amount of copper in vegetable and fruit samples after preconcentration of its pentetate complex, *Journal of Nanoanalysis* 5 (2018). <https://doi.org/10.22034/jna.2018.543609>.
- [4] B. Zhao, S. Li, X. Liao, J. Li, W. Ma, Y. Dong, X. Zhou, Y. Liu, Synthesis and properties of magnetic self-healing polymers: An effective method for improving interface compatibility of doped functional polymers, *ChemNanoMat* 5 (2019) 642–650. <https://doi.org/10.1002/cnma.201800670>.
